# Supplementary material for: METTL18-mediated histidine methylation of RPL3 modulates translation elongation for proteostasis maintenance
Source: eLife. 2022 Jun 8;11:e72780. doi: 10.7554/eLife.72780 (PMC9177149; doi:10.7554/eLife.72780)
Supplement: Figure 1—figure supplement 1—source data 4. [file elife-72780-fig1-figsupp1-data4.xlsx]

## Sheet: Figure1_S1E
Figure1_S1E
Sample	Relative SETDB3 [normalizeto α-Tublin]	Relative METTL18 [normalizeto α-Tublin]
Naïve	1.07019	1.1213
Naïve	0.966551	1.01099
Naïve	0.963258	0.867708
METTL18KO	1.29912	N.D.
METTL18KO	1.00892	N.D.
METTL18KO	1.02546	N.D.
SETD3 KO	N.D.	1.02784
SETD3 KO	N.D.	0.899414
SETD3 KO	N.D.	1.21875
METTL18-SETDB3 DKO	N.D.	N.D.
METTL18-SETDB3 DKO	N.D.	N.D.
METTL18-SETDB3 DKO	N.D.	N.D.

## Sheet: Figure1_S1F
Figure1_S1F
Sample	Fraction of π-N-MeHis
Naïve	0.0467219
Naïve	0.0443158
Naïve	0.0396447
METTL18KO	0.0393139
METTL18KO	0.0432345
METTL18KO	0.0408134
SETD3 KO	0.03811
SETD3 KO	0.051526
SETD3 KO	0.0546353
METTL18-SETDB3 DKO	0.0430614
METTL18-SETDB3 DKO	0.0418635
METTL18-SETDB3 DKO	0.0410858
