# Supplementary material for: METTL18-mediated histidine methylation of RPL3 modulates translation elongation for proteostasis maintenance
Source: eLife. 2022 Jun 8;11:e72780. doi: 10.7554/eLife.72780 (PMC9177149; doi:10.7554/eLife.72780)
Supplement: Figure 1—figure supplement 2—source data 2. [file elife-72780-fig1-figsupp2-data2.xlsx]

## Sheet: Figure1_S2D
Figure1_S2D
Endogenous RPL3 in 60S	Naïve	METTL18 KO
KLPRKTH	35015673	13692335
KLPRKTH + methyl	105330319	0
% methylation	75.0505	0
