# Supplementary material for: METTL18-mediated histidine methylation of RPL3 modulates translation elongation for proteostasis maintenance
Source: eLife. 2022 Jun 8;11:e72780. doi: 10.7554/eLife.72780 (PMC9177149; doi:10.7554/eLife.72780)
Supplement: Figure 1—source data 2. [file elife-72780-fig1-data2.xlsx]

## Sheet: Figure1A
Figure1A
Sample	Fraction of τ-N-methylated histidine Intensity(%)
Naïve	0.253126
Naïve	0.236089
Naïve	0.211472
METTL18KO	0.234725
METTL18KO	0.277085
METTL18KO	0.214789
SETD3 KO	0.0198714
SETD3 KO	0.0163948
SETD3 KO	0.0243562
doubleKO	0.00543319
doubleKO	0.00504655
doubleKO	0.00500241

## Sheet: Figure1F
Figure1F
hRPL3-FLAG	WT	KO	KO+WT rescue	KO+MT rescue
KLPRKTH	172608481	111333337	152174690	503434228
KLPRKTH + methyl	250403438	0	314364918	0
% methylation	59.1954	0	67.3823	0
