# Supplementary material for: METTL18-mediated histidine methylation of RPL3 modulates translation elongation for proteostasis maintenance
Source: eLife. 2022 Jun 8;11:e72780. doi: 10.7554/eLife.72780 (PMC9177149; doi:10.7554/eLife.72780)
Supplement: Figure 3—figure supplement 1—source data 2. [file elife-72780-fig3-figsupp1-data2.xlsx]

## Sheet: Figure3_S1C
Figure3_S1C
Sample	40S	60S	60S/40S	Relative 60S/40S ratio
Naïve	10.9126	32.7285	2.99916	0.98284
Naïve	11.1571	35.3549	3.16882	1.03844
Naïve	10.479	31.2967	2.98661	0.978725
METTL18KO	12.4776	35.8099	2.86994	0.940494
METTL18KO	11.0259	31.5609	2.86243	0.938032
METTL18KO	12.1084	35.616	2.94142	0.963917

## Sheet: Figure3_S1F
Figure3_S1F
Sample	40S	60S	60S/40S	Relative 60S/40S ratio
siCont	9.60688	24.6188	2.56262	1.00866
siCont	12.4882	30.7119	2.45927	0.967982
siCont	10.976	28.537	2.59995	1.02336
siRPL17	10.4204	17.9865	1.72609	0.679398
siRPL17	10.534	17.5842	1.66929	0.657042
siRPL17	11.0387	19.6588	1.78089	0.70097
