# Supplementary material for: METTL18-mediated histidine methylation of RPL3 modulates translation elongation for proteostasis maintenance
Source: eLife. 2022 Jun 8;11:e72780. doi: 10.7554/eLife.72780 (PMC9177149; doi:10.7554/eLife.72780)
Supplement: Figure 4—figure supplement 1—source data 1. [file elife-72780-fig4-figsupp1-data1.xlsx]

## Sheet: Figure4_S1B
Figure4_S1B
Sample	40S	Polysome	Polysome/40S	Relative Polysome/40S ratio
Naïve	2.3299	8.34403	3.58129	0.905905
Naïve	2.5716	9.84258	3.82741	0.968162
Naïve	3.61642	16.0971	4.45112	1.12593
METTL18KO	2.82902	13.1718	4.65594	1.17774
METTL18KO	3.05207	13.8419	4.53524	1.14721
METTL18KO	1.79185	9.09882	5.07788	1.28448

## Sheet: Figure4_S1D
Figure4_S1D
Sample	40S	Polysome	Polysome/40S	Relative Polysome/40S ratio
siCont	1.64056	6.60858	4.02825	1
siCont	1.19658	5.44097	4.54711	1.1288
siCont	2.35967	10.2364	4.33807	1.07691
siRPL17	3.10025	2.42024	0.780661	0.193796
siRPL17	3.04185	2.03901	0.670318	0.166404
siRPL17	2.8545	0.742577	0.260142	0.0645794

## Sheet: Figure4_S1E
Figure4_S1E
Sample	CBB intensity	OP-puro intensity	op-puro/CBB	Rekative op-puro incorporation
Naïve	14220	50155.7	3.52713	1.02048
Naïve	14387.8	45354.3	3.15227	0.912026
Naïve	14962.7	55206.7	3.68962	1.06749
METTL18KO	11987.3	42637.9	3.55691	1.0291
METTL18KO	10796.3	37305.7	3.45541	0.99973
METTL18KO	10531.9	31280.3	2.97005	0.859306
