# Supplementary material for: METTL18-mediated histidine methylation of RPL3 modulates translation elongation for proteostasis maintenance
Source: eLife. 2022 Jun 8;11:e72780. doi: 10.7554/eLife.72780 (PMC9177149; doi:10.7554/eLife.72780)
Supplement: Figure 4—figure supplement 2—source data 3. [file elife-72780-fig4-figsupp2-data3.xlsx]

## Sheet: Figure4_S2D
Figure4_S2D
Sample	U6	Tyr tRNA	Tyr tRNA/U6	Relative Tyr tRNA expression
Naïve	3402.13	407.97	0.119916	0.774447
Naïve	4126.54	751.54	0.182124	1.1762
Naïve	4769.54	774.97	0.162483	1.04936
METTL18KO	3926.01	409.66	0.104345	0.673886
METTL18KO	5526.48	501.7	0.0907811	0.586286
METTL18KO	6314.47	389.59	0.061698	0.39846

## Sheet: Figure4_S2F
Figure4_S2F
Sample	U6	Leu codon	Leu codon/U6	Relative Leu tRNA expression
Naïve	5174.6	6871.45	1.32792	0.971608
Naïve	5577.69	7751.9	1.3898	1.01689
Naïve	6733.28	9308.4	1.38245	1.0115
METTL18KO	5735.87	6853.73	1.19489	0.874273
METTL18KO	5997.42	8899.42	1.48387	1.08572
METTL18KO	6936.4	9505.64	1.3704	1.00269
