# Supplementary material for: METTL18-mediated histidine methylation of RPL3 modulates translation elongation for proteostasis maintenance
Source: eLife. 2022 Jun 8;11:e72780. doi: 10.7554/eLife.72780 (PMC9177149; doi:10.7554/eLife.72780)
Supplement: Figure 5—figure supplement 1—source data 1. [file elife-72780-fig5-figsupp1-data1.xlsx]

## Sheet: Figure5_S1A
Figure5_S1A
	Experimental data				Relative to average of whole RRL
Sample	Triplicate 1	Triplicate 2	Triplicate 3	Average	Triplicate 1	Triplicate 2	Triplicate 3	Average
Whole RRL	5011000	4784000	6802000	5.53233e+06	0.905766	0.864735	1.2295	1
RRL supermanant	68	66	63	1214.33	0.000221064	0.000219799	0.00021763	0.000219497
HEK293T ribosome	1223	1216	1204	1.76533e+06	1.22914e-05	1.19299e-05	1.13876e-05	1.18696e-05
RRL supermanant + HEK293T ribosome	1627000	1800000	1869000	65.6667	0.294089	0.32536	0.337832	0.319094

## Sheet: Figure5_S1B
Figure5_S1B
Sample	Fluc	Rluc
noY	334.9	5169
noY	274.1	4152
noY	307.2	4301
39Y	251.9	10974
39Y	426.6	14810
39Y	398.9	13653
39Y	239.2	11100
39Y	326.5	10104
39Y	363.3	11422
39Y	373.2	11653
