# Supplementary material for: METTL18-mediated histidine methylation of RPL3 modulates translation elongation for proteostasis maintenance
Source: eLife. 2022 Jun 8;11:e72780. doi: 10.7554/eLife.72780 (PMC9177149; doi:10.7554/eLife.72780)
Supplement: Figure 5—source data 1. [file elife-72780-fig5-data1.xlsx]

## Sheet: Figure5B
Figure5B
Sample	Fluc	Rluc	Slope(Fluc/Rluc)	P_general (Slope/Slope of Naïve average)	log2(P_general)
Naïve	251.9	10974	0.0229543	0.808766	-0.306206
Naïve	426.6	14810	0.0288049	1.01491	0.0213451
Naïve	398.9	13653	0.029217	1.02943	0.041842
Naïve	239.2	11100	0.0215495	0.759273	-0.397309
Naïve	326.5	10104	0.0323139	1.13854	0.187189
Naïve	363.3	11422	0.031807	1.12068	0.164379
Naïve	373.2	11653	0.0320261	1.1284	0.17428
METTL18KO	428	11400	0.0375439	1.32281	0.40361
METTL18KO	458.6	14780	0.0310284	1.09325	0.128623
METTL18KO	372	12040	0.030897	1.08862	0.1225
METTL18KO	410.2	12690	0.0323247	1.13892	0.187668
METTL18KO	438.9	13380	0.0328027	1.15576	0.208847
METTL18KO	437.8	13590	0.0322149	1.13505	0.182759
METTL18KO	407.5	12910	0.0315647	1.11214	0.153344
