# Supplementary material for: METTL18-mediated histidine methylation of RPL3 modulates translation elongation for proteostasis maintenance
Source: eLife. 2022 Jun 8;11:e72780. doi: 10.7554/eLife.72780 (PMC9177149; doi:10.7554/eLife.72780)
Supplement: Figure 6—source data 3. [file elife-72780-fig6-data3.xlsx]

## Sheet: Figure6B
Figure6B
Sample	Fraction of cells with aggregates [%]
Naïve_FlucWT-GFP	2.88462
Naïve_FlucWT-GFP	1.50376
Naïve_FlucWT-GFP	0.775194
KO_FlucWT-GFP	6.03448
KO_FlucWT-GFP	5.26316
KO_FlucWT-GFP	4.65116
Naïve_FlucDM-GFP	19.5266
Naïve_FlucDM-GFP	15.3846
Naïve_FlucDM-GFP	13.2812
KO_FLucDM-GFP	32.7044
KO_FLucDM-GFP	30.4348
KO_FLucDM-GFP	35.7143
