# Supplementary material for: METTL18-mediated histidine methylation of RPL3 modulates translation elongation for proteostasis maintenance
Source: eLife. 2022 Jun 8;11:e72780. doi: 10.7554/eLife.72780 (PMC9177149; doi:10.7554/eLife.72780)
Supplement: Figure 9—figure supplement 2—source data 1. [file elife-72780-fig9-figsupp2-data1.xlsx]

## Sheet: Figure9_S2B
Figure9_S2B
Sample	40S	Polysome	Polysome/40S	Relative Polysome/40S ratio
HAP1_Naïve	1.70159	14.8589	8.73237	1
HAP1_Naïve	1.51543	14.8341	9.78868	1.12096
HAP1_Naïve	1.73448	15.8723	9.15105	1.04795
HAP1_METTL18KO	3.10812	13.2683	4.2689	0.488859
HAP1_METTL18KO	2.98812	16.935	5.66744	0.649015
HAP1_METTL18KO	3.2907	17.1458	5.2104	0.596676

## Sheet: Figure9_S2D
Figure9_S2D
Sample	40S	60S	60S/40S	Relative 60S/40S ratio
HAP1_Naïve	11.9368	30.4997	2.55509	0.995533
HAP1_Naïve	10.2033	26.5791	2.60494	1.01496
HAP1_Naïve	13.8043	35.0579	2.53964	0.989512
HAP1_METTL18KO	10.2983	25.9439	2.51924	0.981565
HAP1_METTL18KO	12.0338	29.0853	2.41697	0.941719
HAP1_METTL18KO	8.0273	19.1606	2.38693	0.930014

## Sheet: Figure9_S2E
Figure9_S2E
Sample	18S	28S	28S/18S	Relative 28S/18S ratio
HAP1_Naïve	5.35	12.07	2.25607	1.07177
HAP1_Naïve	5.95	11.42	1.91933	0.911793
HAP1_Naïve	6.16	13.18	2.13961	1.01644
HAP1_METTL18KO	6.92	12.19	1.76156	0.836844
HAP1_METTL18KO	7.1	13.35	1.88028	0.893244
HAP1_METTL18KO	7.06	13.26	1.87819	0.892249
